# Supplementary material for: IL-13 R130Q, a common variant associated with allergy and asthma, enhances effector mechanisms essential for human allergic inflammation
Source: JCI journal article supplement (doi:10.1172/jci22818), 2005-03-01
Supplement: sd1 [file 1]

## ONLINE SUPPLEMENTAL MATERIAL

### *Section 1: Analysis of IL-13-dependent STAT6 responses using a random effects model*

In Figure 2, a conventional two-tailed paired t-test was used to compare STAT6 responses to each concentration of WT IL-13 or IL-13 R130Q. However, this method does not incorporate the correlated nature of the data for an individual donor over the concentration range. Therefore we analyzed the dose-response curves for STAT6 induction in response to the IL-13 variants using a random effects model (43) which can adjust for intra-subject correlations which unavoidably come into play whenever dose-response curves are generated from measurements taken in the same individuals. Such a model may therefore represent an interesting complementary approach to analyze the data generated in experiments like ours.

A random effect model estimates a fixed effect of IL-13 R130Q in reference to WT IL-13 on STAT6 induction over a concentration range chosen to reflect the results of the paired t-test analysis. Using this approach, as compared to WT IL-13, IL-13 R130Q was associated with a  $10.1 \pm 2.6\%$  (SEM) increase in the percentage of STAT6+ monocytes over the 10-90 pg/ml concentration range ( $p=0.001$ ). For example, at the 90 pg/ml dose, the predicted value for WT IL-13 would be 56% and the value for IL-13 R130Q would be 66.1%. Thus the increased biological potency of IL-13 R130Q relative to WT IL-13 was confirmed by two independent statistical approaches

### *Section 2: Analysis of IL-13-dependent CD23 responses using a random effects model*

Analysis of CD23 responses using a random effects model demonstrated that, compared

with WT IL-13, IL-13 R130Q was associated with a  $10.9 \pm 1.8\%$  (SEM) increase in the CD23 response ( $p < 0.001$ ) over the 10-250 pg/ml concentration range.

**Legend to Figure S.1.: Comparison of dose-response curves for WT IL-13, IL-13R130Q (corrected values) and IL-13 R130Q (uncorrected values)** The Figure shows the induction of STAT6 phosphorylation (top panel) and CD23 expression (bottom panel) in normal human monocytes stimulated with increasing concentrations of IL-13. The solid lines represent the dose-response curves for WT IL-13 (closed circles) and IL-13 R130Q (values adjusted using the correction factor: closed triangles) as shown in Figures 2 and 3. The dashed lines represent the dose-response curves for IL-13 R130Q values *not* adjusted using the correction factor (open triangles).

**Legend to Figure S.2.: Induction of AID expression by IL-13 variants** cDNA was prepared from normal human PBMC stimulated with HC (1  $\mu$ M) and WT IL-13, IL-13 R130Q or IL-4 (all at 90 pg/ml) for 72 hours. AID expression was assessed by RT-PCR followed by densitometric analysis of the amplicons, and was normalized to the expression of the housekeeping gene GAPDH. The Figure shows the mean  $\pm$  SE of the results obtained in 2 experiments.

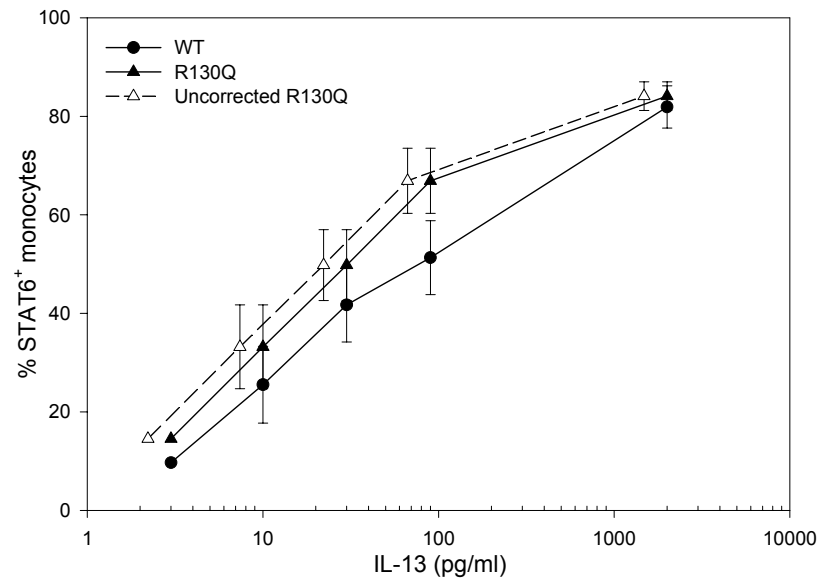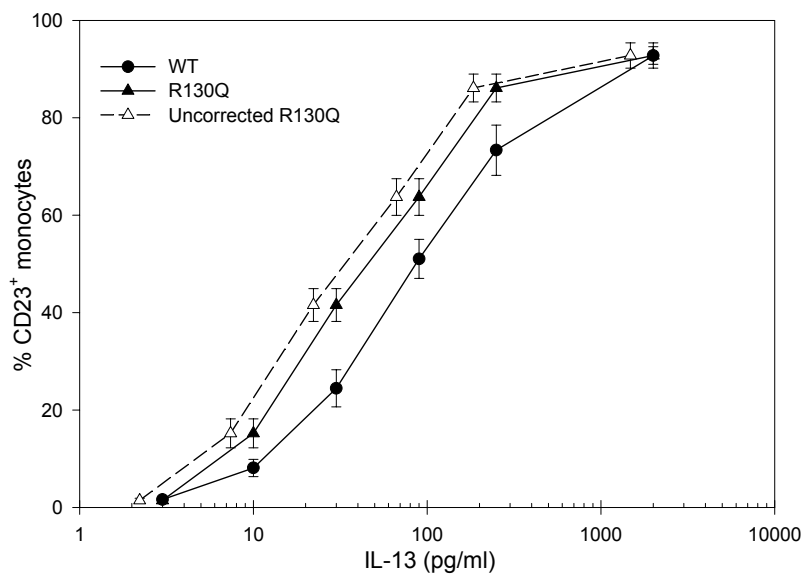

**Figure S.1 (Vladich et al.)**

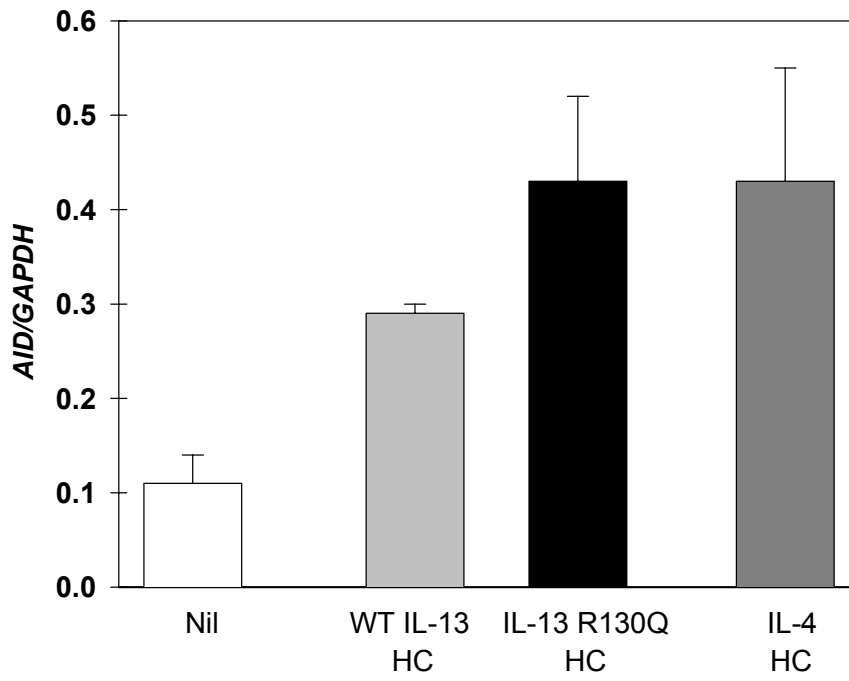

*Figure S.2 (Vladich et al.)*

**Table S.1** *IL-13-dependent induction of STAT6 phosphorylation* The Table shows the anti-log EC<sub>50</sub> values for WT IL-13, IL-13 R130Q (corrected values) and IL-13 R130Q (uncorrected values: UC-R130Q) for individual experiments.

| Experiment                        | IL-13 EC <sub>50</sub> (pg/ml) |                                      |                                      |
|-----------------------------------|--------------------------------|--------------------------------------|--------------------------------------|
|                                   | WT                             | R130Q                                | UC-R130Q                             |
| 1                                 | 0.46                           | 0.005                                | 0.004                                |
| 2                                 | 7.3                            | 0.41                                 | 0.29                                 |
| 3                                 | 32.0                           | 35.3                                 | 26.1                                 |
| 4                                 | 78.8                           | 20.6                                 | 15.3                                 |
| 5                                 | 205                            | 17.0                                 | 12.6                                 |
| 6                                 | 294                            | 163                                  | 120                                  |
| 7                                 | 549                            | 376                                  | 278                                  |
| <b>Geometric mean<br/>(95%CI)</b> | <b>43<br/>(4.4-426)</b>        | <b>7.7<br/>(0.2-279)<sup>†</sup></b> | <b>5.7<br/>(0.2-206)<sup>‡</sup></b> |

<sup>†</sup> p=0.03 compared to WT

<sup>‡</sup> p=0.02 compared to WT

**Table S.2** *IL-13-dependent induction of CD23 expression* The Table shows the anti-log EC<sub>50</sub> values for WT IL-13, IL-13 R130Q (corrected values) and IL-13 R130Q (uncorrected values: UC-R130Q) for individual experiments.

| Experiment                        | IL-13 EC <sub>50</sub> (pg/ml) |                                   |                                   |
|-----------------------------------|--------------------------------|-----------------------------------|-----------------------------------|
|                                   | WT                             | R130Q                             | UC-R130Q                          |
| 1                                 | 42.0                           | 30.1                              | 22.3                              |
| 2                                 | 62.5                           | 31.0                              | 23.0                              |
| 3                                 | 64.3                           | 20.8                              | 22.8                              |
| 4                                 | 75.4                           | 38.6                              | 28.6                              |
| 5                                 | 95.7                           | 85.6                              | 63.4                              |
| 6                                 | 118                            | 46.8                              | 34.6                              |
| 7                                 | 117                            | 36.0                              | 26.7                              |
| 8                                 | 147                            | 25.6                              | 18.9                              |
| 9                                 | 163                            | 34.9                              | 25.9                              |
| 10                                | 210                            | 130                               | 96.0                              |
| 11                                | 251                            | 104.8                             | 77.5                              |
| <b>Geometric mean<br/>(95%CI)</b> | <b>107<br/>(74-155)</b>        | <b>46<br/>(32-67)<sup>†</sup></b> | <b>34<br/>(23-50)<sup>‡</sup></b> |
